# Supplementary material
Source: ML conference proceedings conference paper supplement (https://openreview.net/forum?id=D9LlujFg7d)
Supplement: supplementary_material [file attachment]

# HIVE User Survey

## 1 Survey Outline

To evaluate user perceptions of HIVE, we designed a 15-item survey covering central aspects of the tool. Each item corresponds to one of four evaluation dimensions: Usefulness (U), Quality of Visualization (V), User Experience (E), and Open-ended feedback (O). All closed-form responses were collected using a 5-point Likert scale ranging from 1 (Strongly Disagree) to 5 (Strongly Agree).

| Item | Survey Question                                                                                             | Metric |
|------|-------------------------------------------------------------------------------------------------------------|--------|
| 1    | The tool is useful for understanding and analyzing hyperbolic embeddings in my research.                    | U      |
| 2    | Using HIVE would improve the efficiency of my current workflow.                                             | U      |
| 3    | HIVE offers functionality that traditional static plots do not provide.                                     | U      |
| 4    | I would use HIVE regularly if it were available.                                                            | U      |
| 5    | The visualizations (e.g., Poincaré disk, hierarchical graph) are clear, informative, and easy to interpret. | V      |
| 6    | The hierarchical graph in the right panel effectively reveals the underlying structure of the data.         | V      |
| 7    | Graph edges within the disk are clearly and intuitively displayed.                                          | V      |
| 8    | The distinction between graph and embedding views is visually clear.                                        | V      |
| 9    | The interface is intuitive and pleasant to use for interactive exploration.                                 | E      |
| 10   | Controls (zoom, selection, interpolation) are easy to learn.                                                | E      |
| 11   | The system responds quickly enough for smooth interaction.                                                  | E      |
| 12   | Overall, I am satisfied with my experience using HIVE.                                                      | E      |
| 13   | What features did you find most valuable and why?                                                           | O      |
| 14   | What features are currently missing in HIVE?                                                                | O      |
| 15   | Any additional comments or suggestions.                                                                     | O      |

Table 1: Survey items targeting the key evaluation dimensions. All closed-form responses were collected using a 5-point Likert scale ranging from 1 (Strongly Disagree) to 5 (Strongly Agree).
